# Supplementary material
Source: PubMed Central journal article supplement (PMC2430357)
Supplement: 0801227105_Supplemental_PDF.pdf [file 0801227105_Supplemental_PDF.pdf]

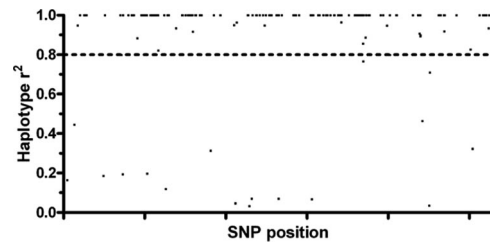

**Fig. S2.** *MAPT* diversity captured by our set of 21 tagging SNPs. Using CEPH data, we analyzed the maximum  $r^2$  between each *MAPT* SNP in HapMap and our set of tagging SNPs in Haploview [Barrett JC, Fry B, Maller J, Daly MJ (2005) Haploview: Analysis and visualization of LD and haplotype maps. *Bioinformatics* 21:263–265.]. The y axis is the greatest  $r^2$  between the SNP loci in HapMap and our tagging SNPs. The x axis is each SNP in HapMap sorted by position from the 5' end of the *MAPT* gene. Of the 252 SNPs in HapMap 232 (92%) had an  $r^2$  of  $>0.80$  with one of our tagging SNPs. Just seven of the SNPs with an  $r^2 < 0.8$  have a minor allele frequency  $>0.10$ .
